# Supplementary material for: The postmonsoon carbon biogeochemistry of estuaries under different levels of anthropogenic impacts
Source: Copernicus journal article supplement (doi:10.5194/bg-2018-310), 2018-07-09
Supplement: Supplementary file [file bg-2018-310-AC2-supplement.pdf]

**Point – 1:**

| Parameters                                                                  | Hooghly                                                                                                                                                       | Sundarbans                                                         | Reference                                          |
|-----------------------------------------------------------------------------|---------------------------------------------------------------------------------------------------------------------------------------------------------------|--------------------------------------------------------------------|----------------------------------------------------|
| <b>Nutrients (postmonsoon)</b>                                              | DIN: 14.72 ± 1.77 to 27.20 ± 2.05 μM<br>DIP: 1.64 ± 0.23 to 2.11 ± 0.46 μM<br>DSi: 77.75 ± 6.57 to 117.38 ± 11.54 μM                                          | DIN: 11.70 ± 7.65 μM<br>DIP: 1.01 ± 0.52 μM<br>DSi: 75.9 ± 36.9 μM | Biswas et al. (2004)<br>Mukhopadhyay et al. (2006) |
| <b>Chla (postmonsoon)</b>                                                   | Chl-a: 2.35 – 2.79 mgm <sup>-3</sup>                                                                                                                          | Chla: 7.88 ± 1.90 mgm <sup>-3</sup>                                | Mukhopadhyay et al. (2006), Dutta et al. (2015)    |
| <b>Population density (districts located on banks of the River Hooghly)</b> | North 24 Parganas and Hooghly: 2500 km <sup>2</sup><br>Kolkata: 22000 km <sup>2</sup><br>Howrah: 3300km <sup>2</sup><br>South 24 Parganas: 820km <sup>2</sup> | No major Cities and town                                           |                                                    |
| <b>Freshwater inflow (postmonsoon)</b>                                      | 3070 - 7301 million m <sup>3</sup>                                                                                                                            | No information available                                           | Rudra et al. (2014)                                |

**Point – 2:**

Conservative  $\delta^{13}\text{C}_{\text{DIC}}$  mixing line was calculated using the expression given by Mook and Tan (1991) as given below:

$$\delta^{13}\text{C}_{\text{DIC(CM)}} = \frac{\text{Sal}_S [\text{DIC}_F \delta^{13}\text{C}_{\text{DIC(F)}} - \text{DIC}_M \delta^{13}\text{C}_{\text{DIC(M)}}] + \text{Sal}_F \text{DIC}_M \delta^{13}\text{C}_{\text{DIC(M)}} - \text{Sal}_M \text{DIC}_F \delta^{13}\text{C}_{\text{DIC(F)}}}{\text{Sal}_S (\text{DIC}_F - \text{DIC}_M) + \text{Sal}_F \text{DIC}_M - \text{Sal}_M \text{DIC}_F}$$

Here, ‘Sal’ denotes salinity, the suffixes CM, F, M and S denote conservative mixing, freshwater end member, marine end member and sample, respectively.  $F_F = \text{freshwater fraction} = 1 - (\text{Sal}_S / \text{Sal}_M)$  and  $F_M = \text{marine water fraction} = (1 - F_F)$ . This is a commonly used expression for such studies and has been followed by many other workers (Samanta et al. (2015); Bouillon et al. (2003))
